# Supplementary material
Source: PubMed Central journal article supplement (PMC5591033)
Supplement: NIHMS902204-supplement-supplemental.pdf [file NIHMS902204-supplement-supplemental.pdf]

**Cell Host & Microbe, Volume 22**

**Supplemental Information**

**Viral Replication Complexes Are Targeted**

**by LC3-Guided Interferon-Inducible GTPases**

**Scott B. Biering, Jayoung Choi, Rachel A. Halstrom, Hailey M. Brown, Wandy L. Beatty, Sanghyun Lee, Broc T. McCune, Erin Dominici, Lelia E. Williams, Robert C. Orchard, Craig B. Wilen, Masahiro Yamamoto, Jörn Coers, Gregory A. Taylor, and Seungmin Hwang**

**A**

|                  |     |     |     |
|------------------|-----|-----|-----|
| <i>Lc3a</i>      | +/+ | +/+ | -/- |
| <i>Lc3b</i>      | +/+ | -/- | -/- |
| <i>Gabarap</i>   | +/+ | +/- | +/- |
| <i>Gabarapl1</i> | +/+ | -/- | -/- |
| <i>Gabarapl2</i> | +/+ | -/- | -/- |

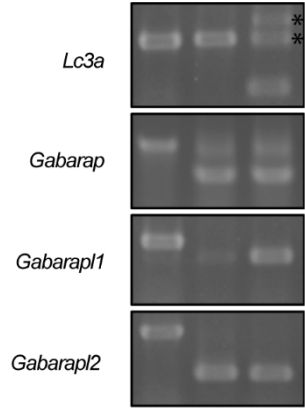

**B**

|                  |     |     |     |
|------------------|-----|-----|-----|
| <i>Lc3a</i>      | +/+ | +/+ | -/- |
| <i>Lc3b</i>      | +/+ | -/- | -/- |
| <i>Gabarap</i>   | +/+ | +/- | +/- |
| <i>Gabarapl1</i> | +/+ | -/- | -/- |
| <i>Gabarapl2</i> | +/+ | -/- | -/- |

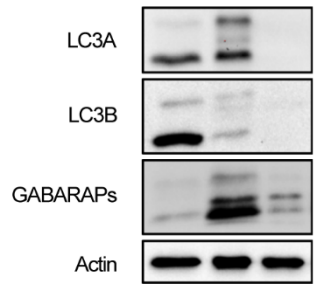

**Figure S1. LC3 Homologs Are Knocked-out, Related to Figure 1.** (A and B) Genotyping PCR (A) and representative western blots (B) demonstrating the knocking-out of the indicated LC3 homologs in MEFs. \* indicates PCR products from frameshift mutants with nonsense mutations (instead of deletion). N=3 replicates.

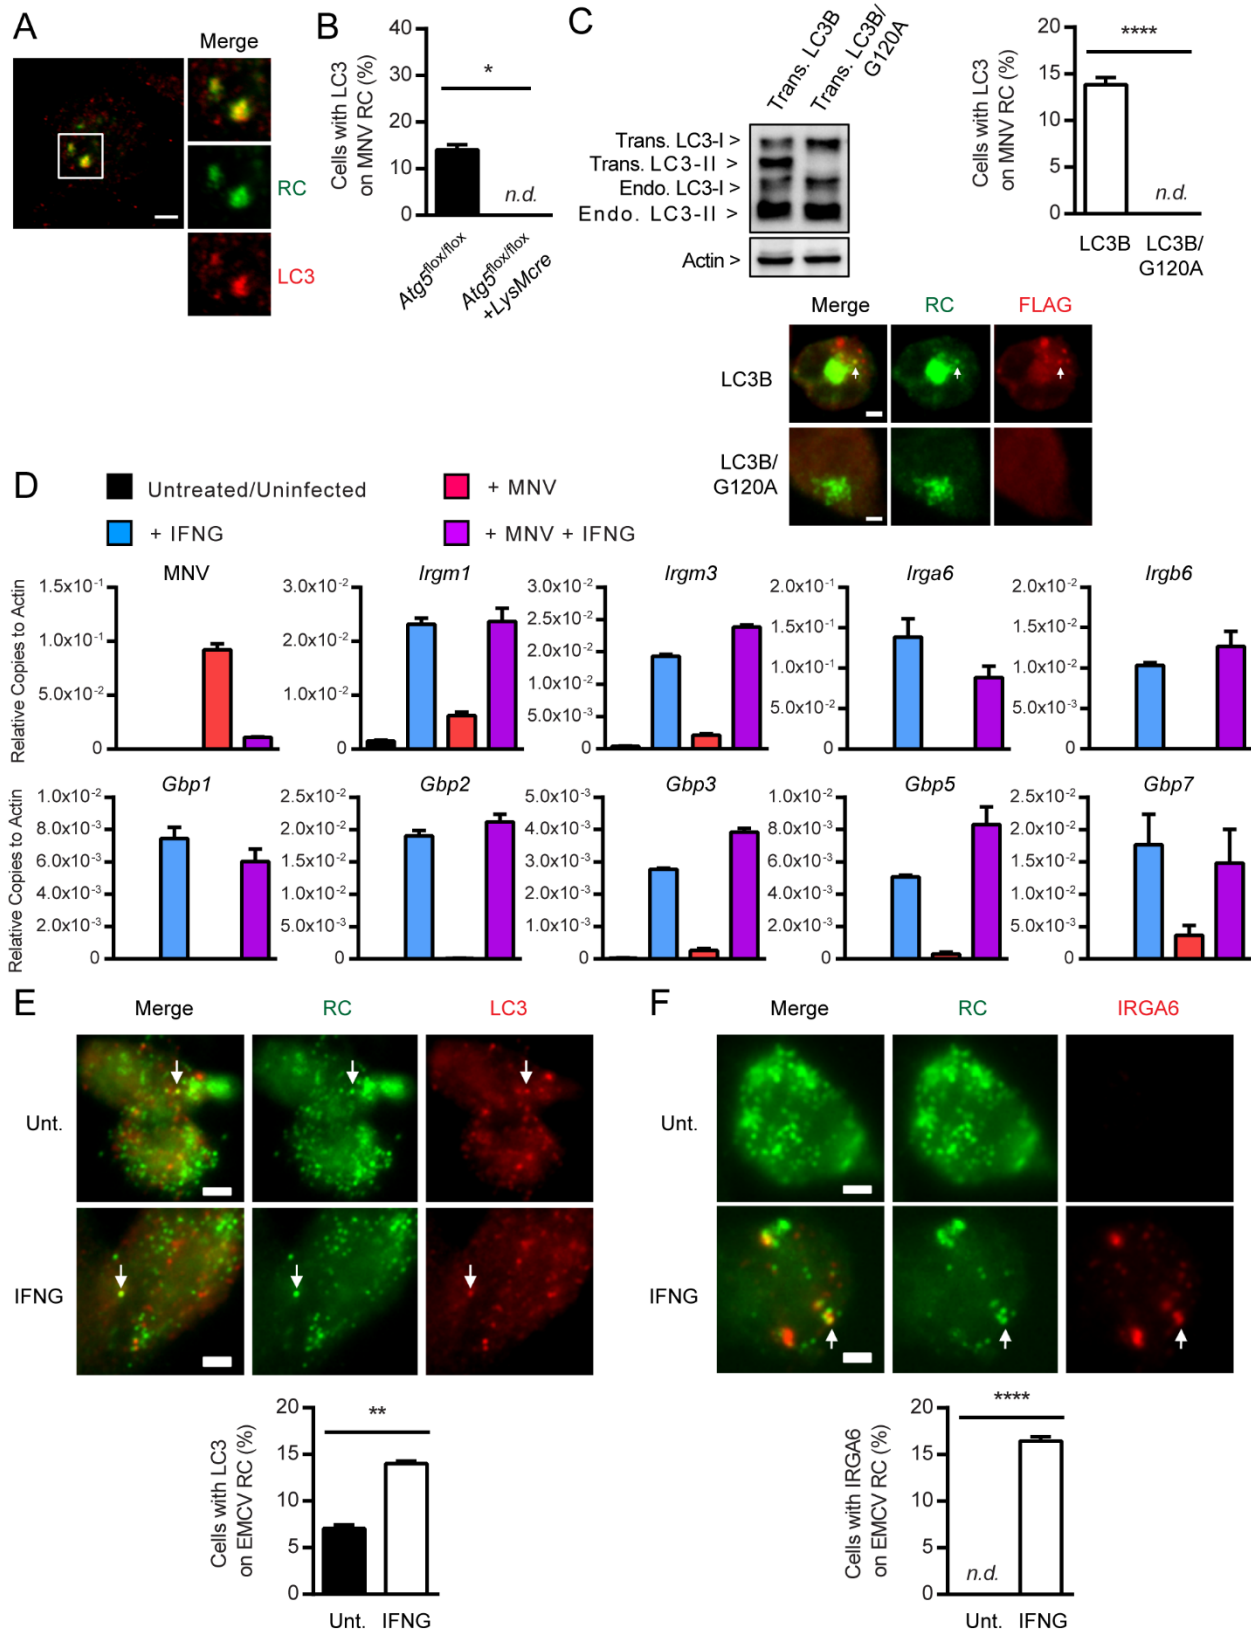

**Figure S2. IFN-Inducible GTPases Are Targeted to Viral RCs via the LC3-Conjugation System, Related to Figure 2.** (A and B) Immunofluorescence assay for the localization of LC3 with regard to the MNV RC in *Atg5<sup>flox/flox</sup>+LysMcre* or control *Atg5<sup>flox/flox</sup>* BMDMs at 10 hour-post-infection (hpi) of MNV at the multiplicity of infection at 5 (MOI=5). Representative images in *Atg5<sup>flox/flox</sup>* BMDMs (A) and quantitation (B). Scale bar, 2  $\mu$ m. Data as mean $\pm$ SEM. N=3 replicates. n.d., not detected. Student's t-test. \*,  $p<0.05$ . (C) Immunofluorescence assay for the localization of wild type (WT) LC3B or non-conjugatable mutant of LC3B (G120A) with regard to the MNV RC at 10 hpi of MNV at MOI=5 and simultaneous treatment of 100 U/ml IFNG in BV-2 cells transduced with lentiviruses expressing FLAG/HA-tagged WT LC3B and LC3B/G120A. A representative western blot of the transduced cells (top, left), representative images (bottom), and quantitation (top, right). White arrows indicate representative colocalization. Scale bar, 5  $\mu$ m. Data as mean $\pm$ SEM. N=3 replicates. n.d., not detected. Student's t-test. \*\*\*\*,  $p<0.0001$ . (D) Quantitative PCR analysis for the transcript levels of the indicated genes in WT BMDMs with or without 10 hrs infection of MNV at MOI=5 and/or 100 U/ml IFNG treatment. N=3 replicates. (E and F) Immunofluorescence assay for the localization of LC3 (E) and IRGA6 (F) with regard to the EMCV RC (via anti-dsRNA antibody) in WT BMDMs at 6 hpi of EMCV at MOI=500 with or without 8 hrs treatment of 100 U/ml IFNG. Representative images (top) and quantitation (bottom). White arrows indicate representative colocalization. Scale bars, 5  $\mu$ m. Data as mean $\pm$ SEM. N=3 replicates. n.d., not detected. Student's t-test. \*\*,  $p<0.01$ ; \*\*\*\*,  $p<0.0001$ . BMDMs for (A), (B), (D), (E), and (F) were from 2 mice for each genotype.

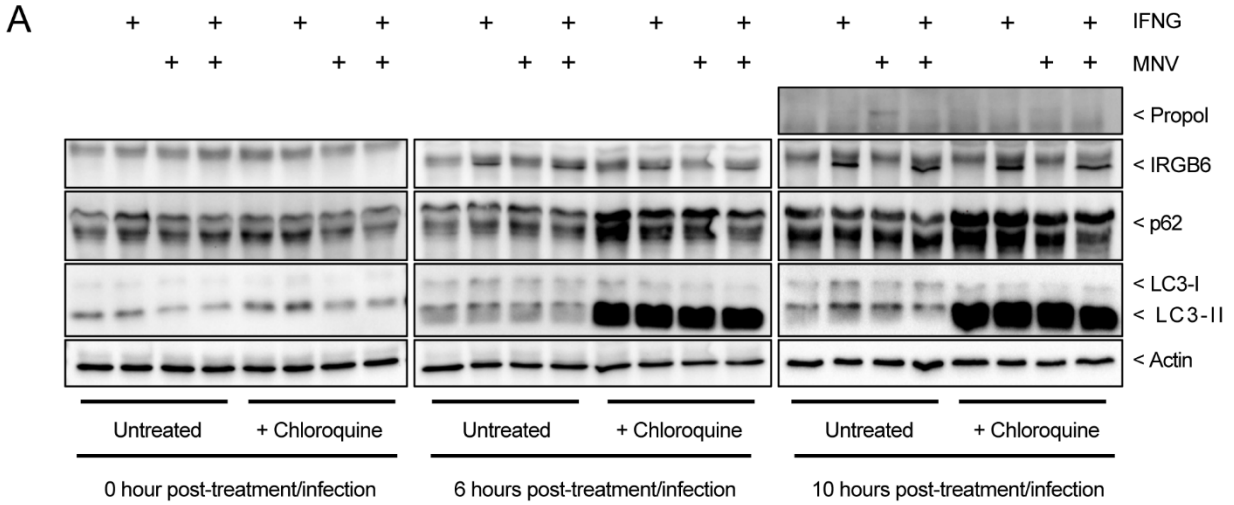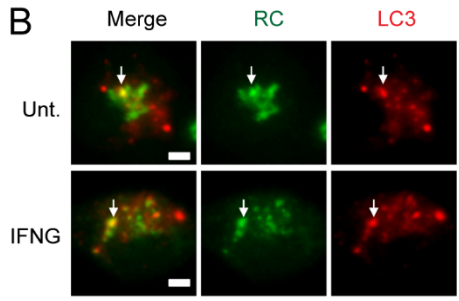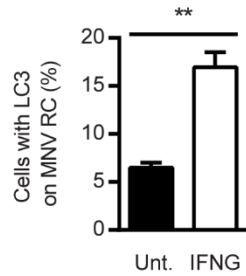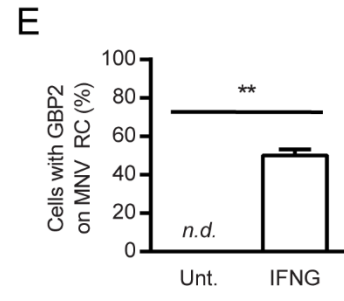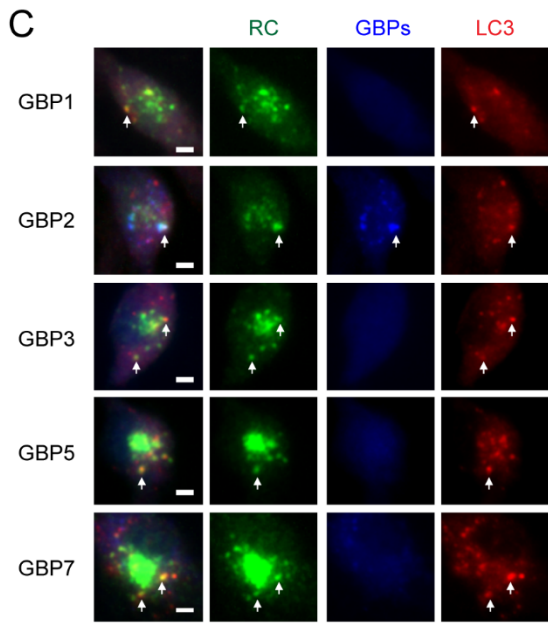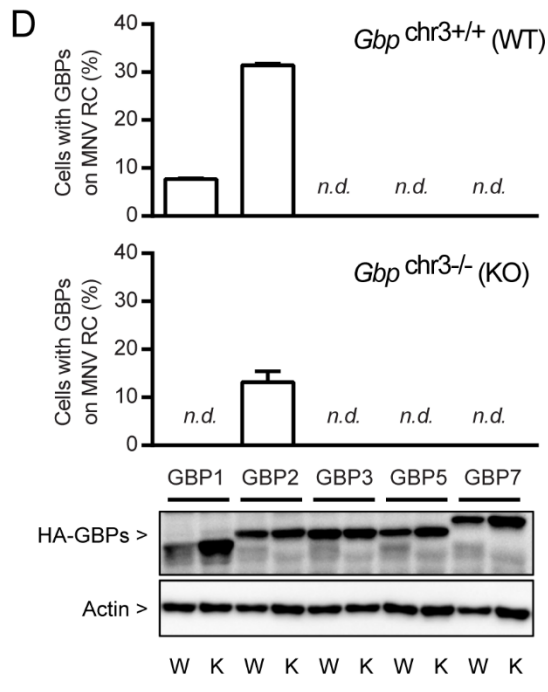

**Figure S3. IFN-Inducible GTPases Are Targeted to the MNV RC, Related to Figure 2.** (A) A representative western blot of LC3 lipidation in WT BMDMs with or without 50  $\mu$ M chloroquine treatment (to inhibit lysosomal degradation), upon infection of MNV at MOI=5 and/or treatment of 100 U/ml IFNG for 0, 6, 10 hours. Proppol for MNV infection, IRGB6 for IFNG treatment, p62 for autophagy status, and Actin as loading control. N=3 replicates. (B) Immunofluorescence assay for the localization of LC3 with regard to the MNV RC in WT BMDMs at 10 hpi of MNV at MOI=5 with simultaneous treatment of none (Unt.) or 100 U/ml IFNG. Representative images (left) and quantitation (right). White arrows indicate representative colocalization. Scale bar, 5  $\mu$ m. Data as mean $\pm$ SEM. N=3 replicates. Student's t-test. \*\*,  $p < 0.01$ . (C and D) immunofluorescence analysis of GBPs with regard to the MNV RC in *Gbp*<sup>chr3+/+</sup> (W) and *Gbp*<sup>chr3-/-</sup> (K) BMDMs transduced with lentiviruses expressing the indicated GBPs at 10 hpi of MNV at MOI=5 and simultaneous treatment of 100 U/ml IFNG. Individual FLAG/HA-tagged GBP was detected by anti-FLAG (C) or anti-HA (D, bottom panel) antibodies. Representative images from the transduced *Gbp*<sup>chr3-/-</sup> BMDMs (C) and quantitation from both BMDMs (D). White arrows in (C) indicate representative colocalization. Scale bars, 5  $\mu$ m. Data as mean $\pm$ SEM. N=3 replicates. n.d., not detected. A representative western blot in D for the expression of individual GBPs. (E) Quantitation of immunofluorescence analysis of GBP2 localization to the MNV RC in WT BMDMs transduced with lentivirus expressing GBP2 at 10 hpi of MNV at MOI=5 with simultaneous treatment of none (Unt.) or 100 U/ml IFNG. Data as mean $\pm$ SEM. N=3 replicates. n.d., not detected. Student's t-test. \*\*,  $p < 0.01$ . BMDMs were from 2 mice for each genotype.

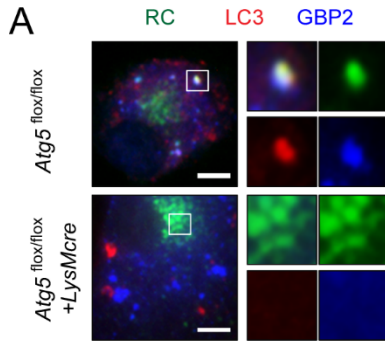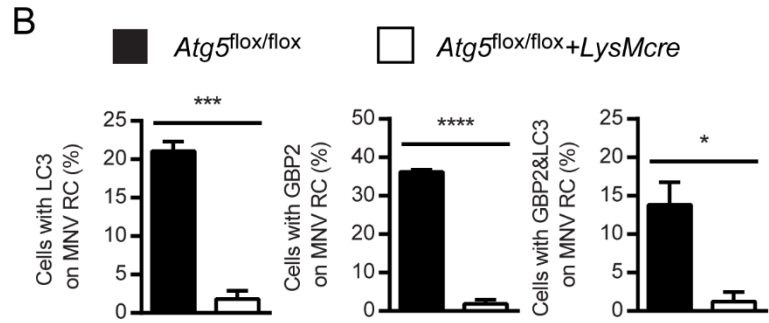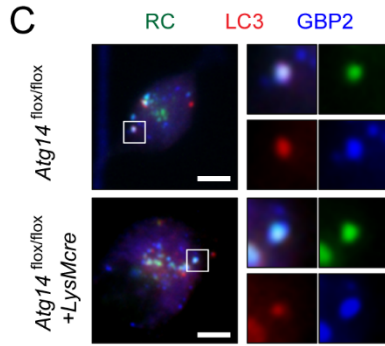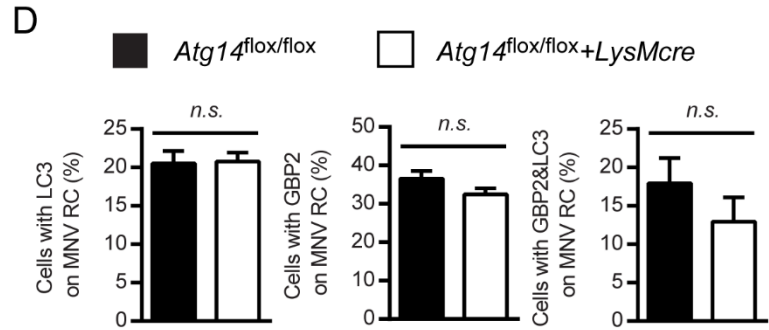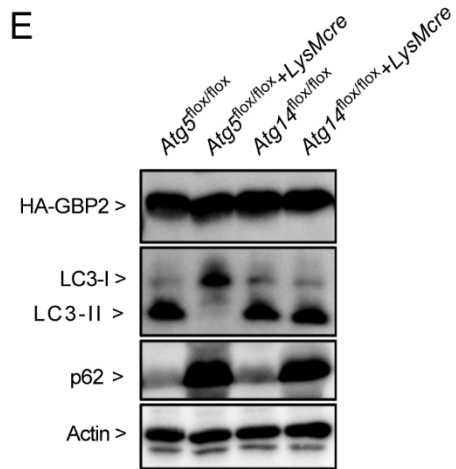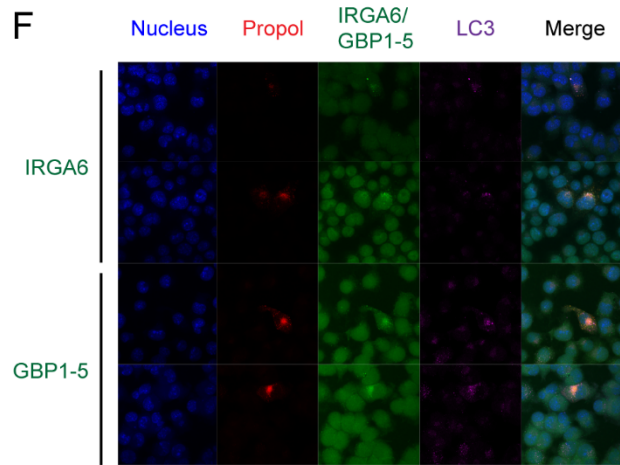



**Figure S4. IFN-Inducible GTPases Are Targeted to the MNV RC via the LC3-Conjugation System, Related to Figures 2 and 3.** (A and B) Immunofluorescence assay for the localization of LC3 and GBP2 with regard to the MNV RC in *Atg5<sup>flox/flox</sup>+LysMcre* and *Atg5<sup>flox/flox</sup>* BMDMs transduced with lentiviruses expressing FLAG/HA-tagged GBP2 at 10 hpi of MNV at MOI=5 and simultaneous treatment of 100 U/ml IFNG. Representative images (A) and quantitation (B). Scale bars, 10  $\mu$ m. Data as mean $\pm$ SEM. N=3 replicates. Student's t-test. \*, p<0.05; \*\*\*, p<0.001; \*\*\*\*, p<0.0001. (C and D) The same assays as described for (A) and (B) in *Atg14<sup>flox/flox</sup>+LysMcre* and *Atg14<sup>flox/flox</sup>* BMDMs. n.s., not significant. N=3 replicates. (E) A representative western blot for the cells described in (A) and (C). N=3 replicates. (F) Representative immunofluorescence images for the localization of endogenous IRGA6 and GBP1-5 with regard to the MNV RC. BV-2 cells were infected with MNV at MOI=25 and simultaneously treated with 100 U/ml IFNG. At 10 hpi, cells were fixed and stained for MNV Propol (RC), LC3, and IRGA6 or GBP1-5. N=2 replicates. BMDMs for (A) to (E) were from 2 mice for each genotype.

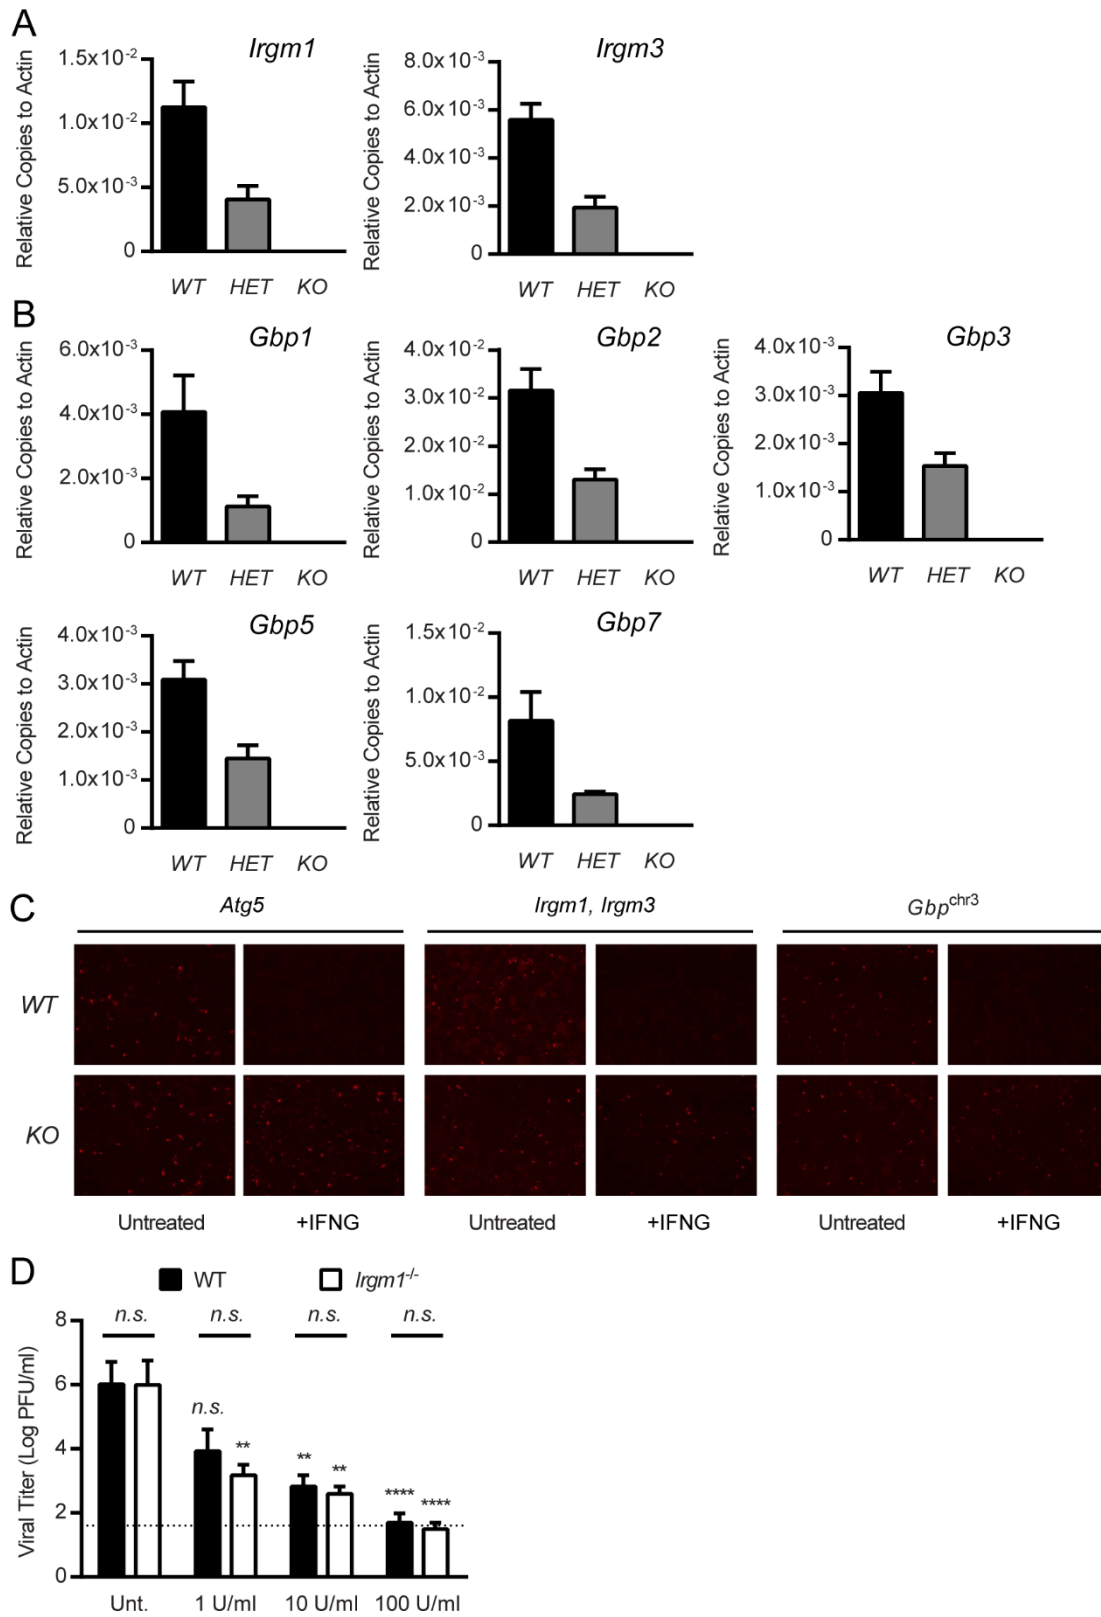

**Figure S5. Analysis of IFN-inducible GTPase Defective cells, Related to Figure 4.** (A) Quantitative PCR analysis for the transcript levels of *Irgm1* and *Irgm3* in BMDMs from *Irgm1*<sup>-/-</sup>*Irgm3*<sup>-/-</sup> mice (KO), compared to wild type (WT) and heterozygote (HET) control mice at 12 hour-post-treatment (hpt) of 100 U/ml IFNG. N=3 replicates. (B) Quantitative PCR analysis for the transcript levels of *Gbp1*, *Gbp2*, *Gbp3*, *Gbp5*, and *Gbp7* in BMDMs from *Gbp*<sup>chr3-/-</sup> mice (KO) compared to wild type (WT) and heterozygote (HET) control mice at 12 hpt of 100 U/ml IFNG. N=3 replicates. (C) Representative images of MNV RCs in BMDMs from *Atg5*<sup>flox/flox</sup>+*LysMcre*, *Irgm1*<sup>-/-</sup>*Irgm3*<sup>-/-</sup>, *GBP*<sup>chr3-/-</sup>, and their respective littermate control mice. Cells were either untreated or treated with 100 U/ml IFNG for 12 hours before infection with MNV at MOI=5 and harvested and analyzed at 12 hpi with anti-Propol immunofluorescence. N=3 replicates. (D) Growth analysis of MNV in BMDMs from *Irgm1*<sup>-/-</sup> and littermate control mice. Cells were treated with none (Unt.) or indicated doses of IFNG for 12 hours and then infected with MNV at MOI=0.05. At 24 hpi, cells were harvested to titer infectious virus. Data as mean±SEM. N=3 replicates. One-way ANOVA with Tukey's multiple comparisons test; n.s., not significant; \*\*, p<0.01; \*\*\*\*, p<0.0001. Dashed line indicates the limit of detection. BMDMs were from 2 mice of each genotype.

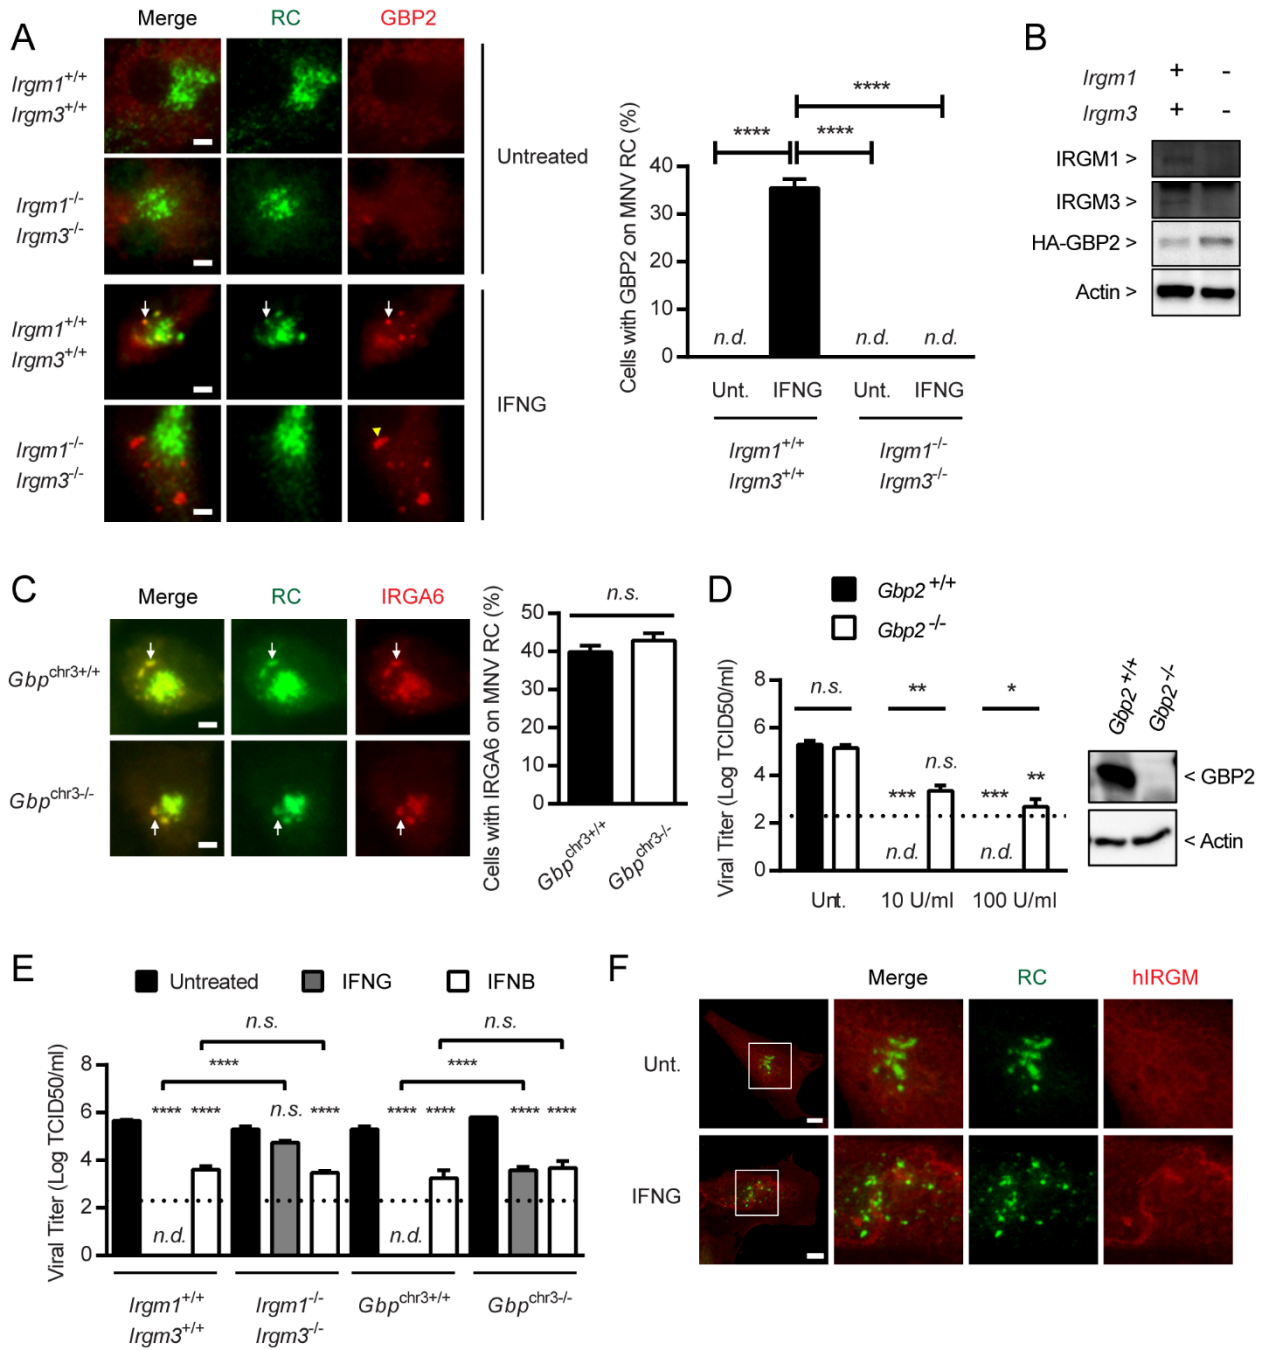

**Figure S6. IFNG Requires the IFN-Inducible GTPases to Inhibit MNV Replication *in vitro* and *in vivo*, Related to Figures 4, 5, and 6.** (A) Immunofluorescence analysis of GBP2 in *Irgm1<sup>+/+</sup>Irgm3<sup>+/+</sup>* and *Irgm1<sup>-/-</sup>Irgm3<sup>-/-</sup>* BMDMs transduced with lentiviruses expressing FLAG/HA-tagged GBP2 at 10 hpi of MNV at MOI=5 with simultaneous treatment of none (Untreated) or 100 U/ml IFNG. Representative images (left) and quantitation (right). White arrows indicate representative colocalization and yellow arrowhead indicates a representative aggregate of GBP2. Scale bars, 5  $\mu$ m. Data as mean $\pm$ SEM. N=3 replicates. Student's t-test.; \*\*\*\*,  $p < 0.0001$ . n.d., not detected. (B) A representative western blot of cells described in (A). N=3 replicates. (C) The same analysis described in (A) for endogenous IRGA6 in *Gbp<sup>chr3+/+</sup>* and *Gbp<sup>chr3-/-</sup>* BMDMs. Data as mean $\pm$ SEM. N=3 replicates. Student's t-test. n.s., not significant. (D) Growth analysis of MNV in WT and *Gbp2<sup>-/-</sup>* BMDMs. Cells were treated with none (Unt.), 10 U/ml or 100 U/ml IFNG for 24 hours and then infected with MNV at MOI=0.05. At 24 hpi, cells were harvested to titer infectious virus. Data as mean $\pm$ SEM. N=4 replicates. n.d., not detected. One-way ANOVA with Tukey's multiple comparisons test; n.s., not significant; \*,  $p < 0.05$ ; \*\*,  $p < 0.01$ ; \*\*\*,  $p < 0.001$ . Dashed line indicates the limit of detection. A representative western blot shown (right). (E) Growth analysis of MNV in BMDMs from *Irgm1<sup>-/-</sup>Irgm3<sup>-/-</sup>*, *GBP<sup>chr3-/-</sup>*, and their respective littermate control mice. Cells were treated with none (Untreated), 100 U/ml of IFNG, or 100 U/ml of IFN-beta (IFNB) for 24 hours and then infected with MNV at MOI=0.05. At 24 hpi, cells were harvested to titer infectious virus. Data as mean $\pm$ SEM. N=3 replicates. n.d., not detected. One-way ANOVA with Tukey's multiple comparisons test; n.s., not significant; \*\*\*\*,  $p < 0.0001$ . Dashed line indicates the limit of detection. (F) Immunofluorescence assay for the localization of endogenous human IRGM (Red) with regard to the MNV RC (Green) in HeLa cells transfected with a plasmid expressing MNV ORF1 for 6 hours followed by treatment with 100 U/ml IFNG for an additional 18 hours. Representative images shown here. Scale bars, 20  $\mu$ m. N=3 replicates. BMDMs for (A) to (E) were from 2 mice for each genotype.

**Table S1. Quantitative PCR primers used to analyze the transcription of genes, Related to Figures 1, S2 and S5.**

| Genes        | Forward Primer           | Reverse Primer             |
|--------------|--------------------------|----------------------------|
| <i>MNV</i>   | agctcaggatggctcggat      | tcaagagcaaggctgaaggg       |
| <i>Irgm1</i> | tgctccactactcccaacat     | gctcctactgacctcaggtaac     |
| <i>Irgm3</i> | ctcatcagcccgtgggtctaaa   | caccgccttaccaatatcttcaa    |
| <i>Irga6</i> | caggacatccgccttaactgt    | aggaagtaagtaccattagcca     |
| <i>Irgb6</i> | aggcatgtaagcacctccac     | ggacagagaggcaggtcac        |
| <i>Gbp1</i>  | acctggagacttcactggct     | tttattcagctggctcctctgtatcc |
| <i>Gbp2</i>  | acctggaacattccctgacc     | acagctcctcctcccgcagag      |
| <i>Gbp3</i>  | ccagaaaaccaactggaacggaa  | tctccagacaaggcacagtc       |
| <i>Gbp5</i>  | cactcagcaacgaggagctgaact | tgttctctatggaaggcagagcc    |
| <i>Gbp7</i>  | ttgaggaaatgccagaggaccagt | gtctccactattgatagcatccacg  |
| <i>Ulk1</i>  | tgcccttgatgagatgttcc     | agtctcctctcaatgcacagc      |
| <i>Ulk2</i>  | tcgtttatcgctaccacaagg    | gcctgctactcacacagttgc      |
| <i>Actin</i> | gccttccttcttgggtatgg     | gcactgtgttgcatagagg        |

**Table S2. Sequence of guide RNAs to delete DNA and primers to screen the deletion, Related to Figure 1 and Figure S1.**

| Gene            | Guide RNA            | Primers for Screening |                      | Expected Size of Product from WT Genome |
|-----------------|----------------------|-----------------------|----------------------|-----------------------------------------|
| <i>Lc3a</i>     | gtgatcatcgagcgctacaa | Forward               | gaccgctgtaaggaggtgc  | 678                                     |
|                 | tgagttgcaggcggcgctg  | Reverse               | tcagaagccgaaggtttctg |                                         |
| <i>Gabarap</i>  | cggggccggtccgatggctg | Forward               | gtctgcctttccccaacgta | 854                                     |
|                 | agcgtcagcgacgctagcct | Reverse               | gatcctagaacggcgcatca |                                         |
| <i>Gabarap1</i> | tagtgcggcgactggcgct  | Forward               | ccagctctgggaaaagcca  | 696                                     |
|                 | tcgaaagcgcagcgtgcgcg | Reverse               | atgggcacaaggctcatctc |                                         |
| <i>Gabarap2</i> | gcgacgactactccacaggc | Forward               | acagcgcttggaacaggtta | 867                                     |
|                 | cggacccgtgtgcctacg   | Reverse               | gaactcggtcgggtacttc  |                                         |
